# Supplementary material for: The Genomic Architecture of Fowl Typhoid Resistance in Commercial Layers
Source: Front Genet. 2018 Nov 19;9:519. doi: 10.3389/fgene.2018.00519 (PMC6252313; doi:10.3389/fgene.2018.00519)
Supplement: Supplementary file 2 [file Table_2.xlsx]

## Sheet: Sheet1
Supplemental Table 2. (A) List of SNP windows associated with fowl typhoid resistance in RHM analysis of the layers suffered the second outbreak.
		windows
Phenotype	Chr	SNP name (start-end )	start position-end position ( in bp)	P-value	log10P
Continues	11	Affx-50516749-Affx-50516842	10968957-11012734	3.26e-06	5.48
	1	Affx-50245919-Affx-50246188	162300891-162442245	7.69e-06	5.11407
	26	Affx-51147801-Affx-51147946	5019808-5058585	2.79e-05	4.5544
	11	Affx-50544574-Affx-50544673	4927717-4968074	3.18e-05	4.49757
	2	Affx-51001006-Affx-51001236	93128201-93291627	5.95e-05	4.22548
	23	Affx-51098245-Affx-51098392	5020685-5065576	6.22e-05	4.20621
	24	Affx-51107102-Affx-51107231	2146135-2183253	6.8e-05	4.17
	24	Affx-51107006-Affx-51107003	2118611-2119436	6.8e-05	4.17
SNPs in bold had a genome-wide significant association with fowl typhoid
Supplemental Table 2.(B) Manhattan and Q-Q plots displaying the RHM results from the second fowl typhoid outbreak (continuous phenotypes). (I) Genomic location is plotted against -log10(P) in the Manhattan plot. Genome-wide (P < 0.05) and suggestive genome-wide thresholds are shown as red and blue lines, respectively ;(II) Q–Q plot of observed P-values against the expected P-values for Salmonella…
(I)
(II)
