# Supplementary material for: The Genomic Architecture of Fowl Typhoid Resistance in Commercial Layers
Source: Front Genet. 2018 Nov 19;9:519. doi: 10.3389/fgene.2018.00519 (PMC6252313; doi:10.3389/fgene.2018.00519)
Supplement: Supplementary file 3 [file Table_3.xlsx]

## Sheet: Sheet1
Supplemental Table 3. List of annotated genes located in the candidate genomic regions identified for fowl typhoid in the two layer populations from the first and the second outbreak, respectively.
First outbreak
Gene stable ID	Chromosome/scaffold name	Gene start (bp)	Gene end (bp)	Strand	Gene name	Gene description
ENSGALG00000025174	5	51686104	51686189	1	gga-mir-1771	gga-mir-1771
ENSGALG00000018329	5	50769283	50769380	1	gga-mir-203a	gga-mir-203a
ENSGALG00000011619	5	51660596	51662558	1	SIVA1	SIVA1 apoptosis inducing factor
ENSGALG00000011533	5	50552442	50561187	1	XRCC3	X-ray repair cross complementing 3
ENSGALG00000011581	5	50787246	50883770	1	KIF26A	kinesin family member 26A
ENSGALG00000011620	5	51675984	51745443	1	AKT1	RAC-alpha serine/threonine-protein kinase
ENSGALG00000011548	5	50573878	50636169	1	PPP1R13B	protein phosphatase 1 regulatory subunit 13B
ENSGALG00000011590	5	51484528	51491786	1	TMEM179	transmembrane protein 179
ENSGALG00000027643	5	50654403	50657365	1	RD3L	retinal degeneration 3-like
ENSGALG00000011572	5	50712094	50758331	1	ASPG	asparaginase
ENSGALG00000011522	5	50411901	50432633	1	TRMT61A	tRNA methyltransferase 61A
ENSGALG00000011608	5	51578235	51595388	1	INF2	inverted formin, FH2 and WH2 domain containing
ENSGALG00000031062	5	50484678	50489630	1	BAG5	BAG family molecular chaperone regulator 5
ENSGALG00000011511	5	50400209	50407920	1	CKB	Creatine kinase B-type
ENSGALG00000011565	5	50651466	50702881	1	TDRD9	tudor domain containing 9
ENSGALG00000011618	5	51625809	51648726	1	ADSSL1	adenylosuccinate synthase like 1
ENSGALG00000044519	5	50489701	50496944	1	APOPT1	apoptogenic 1, mitochondrial
ENSGALG00000011534	5	50561599	50571908	1	ZFYVE21	zinc finger FYVE-type containing 21
Second outbreak
Gene stable ID	Chromosome/scaffold name	Gene start (bp)	Gene end (bp)	Strand	Gene name	Gene description
ENSGALG00000013265	1	67102124	67141501	1	GYS2	glycogen synthase 2
ENSGALG00000030943	1	67241669	67263388	-1	KRAS	KRAS proto-oncogene, GTPase
ENSGALG00000041414	1	67641436	67643827	-1	BHLHE41	basic helix-loop-helix family member e41
ENSGALG00000015435	1	91417916	91498347	-1	DCAF6	DDB1 and CUL4 associated factor 6
ENSGALG00000015438	1	91524199	91543808	-1	MPZL1	myelin protein zero like 1
ENSGALG00000040275	1	91546899	91582033	-1	RCSD1	capZ-interacting protein
ENSGALG00000040426	1	91590570	91595426	1	CREG1	Protein CREG1
ENSGALG00000015441	1	91604244	91650623	1	CD247	T-cell surface glycoprotein CD3 zeta chain precursor
ENSGALG00000016768	1	133106432	133137510	-1	LONRF2	LON peptidase N-terminal domain and ring finger 2
ENSGALG00000034004	1	194432359	194438661	1	TRIM3	tripartite motif containing 3
ENSGALG00000022586	1	194439299	194442894	1	HPX	hemopexin
ENSGALG00000046164	1	194444274	194448722	1	APBB1	amyloid beta precursor protein binding family B member 1
ENSGALG00000036106	1	194449530	194453332	-1	SMPD1	sphingomyelin phosphodiesterase 1
ENSGALG00000039837	1	194457115	194459494	-1	CCKBR	gastrin/cholecystokinin type B receptor
ENSGALG00000022704	1	194460896	194463263	-1	CNGA4	cyclic nucleotide gated channel alpha 4
ENSGALG00000003416	1	194465096	194472407	1	FAM160A2	family with sequence similarity 160 member A2
ENSGALG00000017343	1	194532764	194535871	-1	FOLR1	folate receptor alpha precursor
ENSGALG00000017347	1	194562710	194576539	1	HBBR	Gallus gallus hemoglobin subunit epsilon (HBE), mRNA.
ENSGALG00000028273	1	194567561	194575005	1	HBBA	Hemoglobin subunit beta
ENSGALG00000030474	1	194589743	194590690	-1	OR52R1	olfactory receptor family 52 subfamily R member 1
ENSGALG00000044591	1	194624671	194625627	-1	OR51E2	olfactory receptor family 51 subfamily E member 2
ENSGALG00000013149	2	85073411	85199421	-1	MOCOS	molybdenum cofactor sulfurase
ENSGALG00000034050	2	127839268	127882029	1	MTDH	metadherin
ENSGALG00000045196	2	127896686	127957080	1	LAPTM4B	lysosomal protein transmembrane 4 beta
ENSGALG00000028032	3	106882967	107143719	1	MSRA	methionine sulfoxide reductase A
ENSGALG00000002980	6	8157125	8275706	1	RTKN2	rhotekin-2
ENSGALG00000002967	6	8214087	8229826	-1	ZNF365	zinc finger protein 365
ENSGALG00000031534	6	8297642	8403485	-1	ARID5B	AT-rich interactive domain-containing protein 5B
ENSGALG00000031720	6	20290540	20321846	-1	LGI1	leucine-rich glioma-inactivated protein 1 precursor
ENSGALG00000006622	6	20322074	20344761	1	FRA10AC1	FRA10A associated CGG repeat 1
ENSGALG00000006626	6	20345450	20374060	-1	PDE6C	cone cGMP-specific 3',5'-cyclic phosphodiesterase subunit alpha'
ENSGALG00000006629	6	20385382	20390788	1	RBP4A	Retinol-binding protein 4
ENSGALG00000026733	6	20391630	20397358	-1	FFAR4	free fatty acid receptor 4
ENSGALG00000006639	6	20405524	20418860	-1	CEP55	centrosomal protein 55
ENSGALG00000006705	6	20420978	20488650	1	MYOF	myoferlin
ENSGALG00000033695	6	20555766	20558838	-1	CYP26A1	cytochrome P450 26A1
ENSGALG00000043213	6	20561818	20567803	-1	CYP26C1	cytochrome P450 family 26 subfamily C member 1
ENSGALG00000006763	6	20567411	20654398	-1	EXOC6	exocyst complex component 6
ENSGALG00000033461	7	31378969	31387982	1	HNMT	Gallus gallus histamine N-methyltransferase-like (LOC771456), mRNA.
ENSGALG00000012377	7	31413137	31428256	1	HNMT	histamine N-methyltransferase
ENSGALG00000012380	7	31558414	31573289	1	SPOPL	speckle type BTB/POZ protein like
ENSGALG00000030157	10	14990376	15085983	1	MCTP2	multiple C2 and transmembrane domain containing 2
ENSGALG00000004935	11	11011331	11028944	1	LSM14A	LSM14A, mRNA processing body assembly factor
ENSGALG00000004943	11	11030199	11043197	1	SS18L2	SS18 like 2
ENSGALG00000004949	11	11034188	11075126	-1	KIAA0355	KIAA0355
ENSGALG00000004956	11	11103487	11124330	1	GPI	glucose-6-phosphate isomerase
ENSGALG00000025864	11	11180251	11250088	-1	WTIP	WT1 interacting protein
ENSGALG00000000713	11	19692863	19834198	1	ZFHX3	zinc finger homeobox 3
ENSGALG00000025383	11	19730962	19731058	-1	gga-mir-1699	gga-mir-1699
ENSGALG00000000787	11	19949492	19959954	-1	DHX38	DEAH-box helicase 38
ENSGALG00000000802	11	19961318	19964884	-1	DHODH	dihydroorotate dehydrogenase (quinone)
ENSGALG00000000811	11	19965164	19972343	-1	IST1	IST1, ESCRT-III associated factor
ENSGALG00000000817	11	19972951	19984338	1	ZNF821	zinc finger protein 821
ENSGALG00000028253	11	19990903	19992975	-1	ATXN1L	ataxin 1 like
ENSGALG00000000848	11	19994788	20036521	1	AP1G1	AP-1 complex subunit gamma-1
ENSGALG00000006462	13	15972376	15988375	1	PPP2CA	protein phosphatase 2 catalytic subunit alpha
ENSGALG00000031487	13	16330488	16516432	1	FSTL4	follistatin-related protein 4 precursor
ENSGALG00000021113	13	16810412	16811625	1	IL3	interleukin 3 precursor
ENSGALG00000006785	13	16977371	16983282	-1	IRF1	Interferon regulatory factor 1
ENSGALG00000023822	13	16994393	16997077	-1	IL5	interleukin 5 precursor
ENSGALG00000006801	13	17037892	17039562	1	IL13	interleukin 13 isoform 2 precursor
ENSGALG00000001828	19	4089023	4097513	1	SH2B2	SH2B adaptor protein 2
ENSGALG00000001833	19	4102523	4110937	1	PRKRIP1	PRKR-interacting protein 1 homolog
ENSGALG00000001837	19	4112360	4121641	1	ORAI2	Protein orai-2
ENSGALG00000001844	19	4125579	4127076	-1	ALKBH4	alkB homolog 4, lysine demethylase
ENSGALG00000001852	19	4128855	4140535	1	LRWD1	leucine rich repeats and WD repeat domain containing 1
ENSGALG00000030808	19	4140633	4141920	-1	POLR2J	RNA polymerase II subunit J
ENSGALG00000001905	19	4156282	4182491	-1	DTX2	deltex E3 ubiquitin ligase 2
ENSGALG00000001917	19	4192265	4200891	1	SSC4D	scavenger receptor cysteine rich family member with 4 domains
ENSGALG00000017358	19	4207586	4226145	1	YWHAG	14-3-3 protein gamma
ENSGALG00000001926	19	4228616	4230508	-1	HSPB1	heat shock protein beta-1
ENSGALG00000013639	23	2404806	2407364	-1	SYF2	SYF2 pre-mRNA splicing factor
ENSGALG00000043372	23	2440186	2486413	1	RUNX3	runt related transcription factor 3
ENSGALG00000001262	23	2508971	2526376	-1	CLIC4	chloride intracellular channel 4
ENSGALG00000001283	23	2533128	2549839	-1	SRRM1	serine/arginine repetitive matrix protein 1
ENSGALG00000030900	23	2551275	2558427	-1	NCMAP	non-compact myelin associated protein
ENSGALG00000001329	23	2610406	2669406	1	EPB41	erythrocyte membrane protein band 4.1
ENSGALG00000024318	23	2676530	2677738	-1	TMEM200B	transmembrane protein 200B
ENSGALG00000040519	23	4980932	4982596	-1	PEF1	penta-EF-hand domain containing 1
ENSGALG00000043209	23	5006341	5016331	-1	ADGRB2	adhesion G protein-coupled receptor B2
ENSGALG00000003265	23	5077320	5094760	-1	PTP4A2	protein tyrosine phosphatase type IVA, member 2
ENSGALG00000025462	23	5087392	5087467	-1	gga-mir-1780	gga-mir-1780
ENSGALG00000003272	23	5096859	5111703	1	KHDRBS1	KH domain-containing, RNA-binding, signal transduction-associated protein 1
ENSGALG00000003287	23	5118151	5125207	1	TMEM39B	transmembrane protein 39B
ENSGALG00000032335	23	5135541	5137290	1	MARCKSL1	MARCKS like 1
ENSGALG00000003297	23	5137852	5152251	-1	HDAC1	Histone deacetylase 1
ENSGALG00000000466	23	5140463	5158527	-1	LCK	LCK proto-oncogene, Src family tyrosine kinase
ENSGALG00000003301	23	5160100	5160357	-1	FAM167B	family with sequence similarity 167 member B
ENSGALG00000003337	23	5166291	5170582	-1	EIF3I	eukaryotic translation initiation factor 3 subunit I
ENSGALG00000037052	23	5170433	5172814	1	TMEM234	transmembrane protein 234
ENSGALG00000046649	23	5173725	5176544	-1	DCDC2B	doublecortin domain containing 2B
ENSGALG00000030701	23	5177194	5179525	-1	IQCC	IQ domain-containing protein C
ENSGALG00000003241	23	5179384	5181209	-1	CCDC28B	coiled-coil domain containing 28B
ENSGALG00000001437	24	1863780	2108022	1	NTM	protein CEPU-1 precursor
ENSGALG00000025328	24	2012309	2012385	1	gga-mir-1601	gga-mir-1601
ENSGALG00000001442	24	2114867	2367108	-1	OPCML	opioid-binding protein/cell adhesion molecule homolog precursor
ENSGALG00000014582	24	4670461	4826288	-1	CADM1	cell adhesion molecule 1
ENSGALG00000026265	24	4783272	4783381	-1	gga-mir-6612	gga-mir-6612
ENSGALG00000043002	26	4985455	4986384	1	TOMM6	translocase of outer mitochondrial membrane 6
ENSGALG00000003474	26	5021879	5026730	-1	MED20	Mediator of RNA polymerase II transcription subunit 20
ENSGALG00000003467	26	5026787	5029465	1	BYSL	bystin like
ENSGALG00000003485	26	5031084	5043504	-1	CCND3	cyclin D3
ENSGALG00000003498	26	5069094	5076726	1	TAF8	Transcription initiation factor TFIID subunit 8
ENSGALG00000023763	26	5078240	5080905	-1	PIFO	primary cilia formation
ENSGALG00000023760	26	5088652	5102917	-1	CHIA	acidic mammalian chitinase precursor
ENSGALG00000026858	26	5123258	5124762	1	BTG2	BTG anti-proliferation factor 2
ENSGALG00000034067	26	5133650	5140211	-1	FMOD	fibromodulin precursor
ENSGALG00000034456	26	5170534	5172975	1	PRELP	proline and arginine rich end leucine rich repeat protein
ENSGALG00000033234	28	3339736	3346314	-1	JAK3	Janus kinase 3
ENSGALG00000002621	28	3655930	3662852	-1	SLC25A42	solute carrier family 25 member 42
ENSGALG00000003024	28	3671339	3676081	-1	ARMC6	armadillo repeat containing 6
ENSGALG00000003047	28	3676512	3687043	1	SUGP2	SURP and G-patch domain containing 2
ENSGALG00000003074	28	3704908	3725461	1	HOMER3	homer scaffolding protein 3
ENSGALG00000003130	28	3733488	3739178	-1	DDX49	probable ATP-dependent RNA helicase DDX49
ENSGALG00000003153	28	3739329	3744161	1	COPE	Coatomer subunit epsilon
ENSGALG00000003161	28	3758227	3760332	1	GDF3	embryonic growth/differentiation factor 1
ENSGALG00000003220	28	3764045	3781142	-1	UPF1	UPF1, RNA helicase and ATPase
ENSGALG00000003283	28	3800421	3815388	1	COMP	cartilage oligomeric matrix protein
ENSGALG00000003304	28	3825550	3857837	-1	CRTC1	CREB regulated transcription coactivator 1
